# Supplementary material for: The Curious Case of the HepG2 Cell Line: 40 Years of Expertise
Source: MDPI journal article supplement (doi:10.3390/ijms222313135), 2021-12-04
Supplement: s1 [file s1]

**Supplementary Material Table S1** Characterization of human hepatic cell lines

| Cell line | Cell type                | Morphology <sup>1</sup> | Mutated genes <sup>2</sup> | Number of chromosomes                                     | Number of articles (PubMed) | References |
|-----------|--------------------------|-------------------------|----------------------------|-----------------------------------------------------------|-----------------------------|------------|
| SK-Hep-1  | Adenocarcinoma           | Epithelial              | CDKN2A, BRAF               | 56-64                                                     | 602                         | [1,2]      |
| Huh6      | Hepatoblastoma           | Epithelial              | CTNNB1, TP53               | NA                                                        | 212                         | [3–5]      |
| HCC.1.1   | Hepatocellular Carcinoma | Epithelial              | NA                         | Gains: 7, 8, 12q, and 20p and losses: 4, 6, 13q and 8, 9p | 2                           | [6,7]      |
| HCC.2     |                          |                         |                            |                                                           | 2                           |            |
| HCC.1.2   |                          |                         |                            |                                                           | 2                           |            |
| HCC.3     |                          |                         |                            |                                                           | 1                           | [6]        |
| Hep3B     | Hepatocellular Carcinoma | Epithelial              | AXIN1, RB1                 | ≈60                                                       | 2,994                       | [3,8]      |
| HLE       | Hepatocellular Carcinoma | Epithelial              | TERT, TP53                 | NA                                                        | 369                         | [14,15]    |
| Huh7      | Hepatocellular Carcinoma | Epithelial              | KDR, POLD3, TERT, TP53     | 55-63                                                     | 6,463                       | [3,9–11]   |
| MHCC97H   | Hepatocellular Carcinoma | Epithelial              | BRD7, KEAP1, TP53          | 59-65                                                     | 157                         | [9,12]     |

|          |                          |            |                           |       |    |              |
|----------|--------------------------|------------|---------------------------|-------|----|--------------|
| PLC.PRF5 | Hepatocellular Carcinoma | Epithelial | CDKN2A, TP53, TSC2        | 50-60 | 33 | [9,13,14]    |
| SNU182   | Hepatocellular Carcinoma | Epithelial | TP53                      | 50-56 | 41 | [15–17]      |
| SNU354   |                          |            | ARID2, AXIN1, TERT        | NA    | 18 | [9,18]       |
| SNU368   |                          |            | ARID1A, AXIN1, TERT, TP53 | 78-84 | 13 | [9,15,19]    |
| SNU387   |                          |            | NRAS, TERT, TP53          | ≈67   | 57 | [19–21]      |
| SNU398   |                          |            | CTNNB1, TP53              | 57-62 | 80 | [9,15,19]    |
| SNU423   |                          |            | TERT, TP53                | ≈79   | 33 | [9,19,20,22] |
| SNU475   |                          |            |                           | 58-66 | 45 | [15,19,20]   |
| SNU739   |                          |            | ARID1B, TERT, TP53        | NA    | 5  | [9,19]       |
| SNU761   |                          |            | TP53                      | NA    | 13 | [9]          |
| SNU878   |                          |            | TSC2, TP53                | NA    | 2  | [9,19]       |
| SNU886   |                          |            | TERT, TP53                | NA    | 3  |              |

|          |                                    |                                              |                                             |              |        |              |
|----------|------------------------------------|----------------------------------------------|---------------------------------------------|--------------|--------|--------------|
| MT-CHC01 | Intrahepatic<br>cholangiocarcinoma | Epithelial                                   | KRAS                                        | 52-77        | 4      | [12,23]      |
| THLE-2   | Normal                             | Epithelial                                   | No mutations                                | near diploid | 74     | [24]         |
| THLE-3   |                                    |                                              |                                             |              | 39     |              |
| HepaRG   | Hepatocellular Carcinoma           | Epithelial-                                  | PLIN2, ANXA1,<br>H2AFY, SNX1,<br>GCHFR, APO | 46           | 880    | [25–27]      |
| TFK-1    | Cholangiocarcinoma                 | Epithelial cells<br>growing as<br>monolayers | TP53                                        | ≈72 (64-81)  | 102    | [28]         |
| SNU449   | Hepatocellular Carcinoma           | Epithelial,<br>diffusely<br>spreading cells  | ARID1A, AXIN1,<br>TP53                      | 57-63        | 139    | [9,15,19,29] |
| HepG2    | Hepatoblastoma                     | Epithelial                                   | CTNNB1                                      | 50-60        | 34,021 | [30,31]      |
| JHH1     | Hepatocellular Carcinoma           | Epithelial                                   | CREBBP                                      | NA           | 13     | [32,33]      |
| JHH2     |                                    |                                              | CDKN2A, TERT,<br>TP53                       | NA           | 8      | [9,33]       |
| JHH4     |                                    |                                              | ACVR2A, TERT,<br>TP53                       | 74           | 16     | [5,34]       |

|         |                          |               |                                                                                                                                    |       |     |         |
|---------|--------------------------|---------------|------------------------------------------------------------------------------------------------------------------------------------|-------|-----|---------|
| JHH5    |                          |               | AXIN1, TP53, TERT                                                                                                                  | NA    | 5   | [9,20]  |
| JHH6    |                          |               | TP53, TERT                                                                                                                         | NA    | 25  |         |
| JHH7    |                          |               |                                                                                                                                    | NA    | 23  |         |
| Li7     | Hepatocellular Carcinoma | Epithelial    | TERT                                                                                                                               | NA    | 26  | [9,35]  |
| Mahlavu | Hepatocellular Carcinoma | Fibroblastoid | PIK3CA, TP53                                                                                                                       | NA    | 100 | [36,37] |
| Fa2N-4  | Normal,                  | Hepatocytes   | NA                                                                                                                                 | NA    | 21  | [38]    |
| B1      | Hepatocellular Carcinoma | NA            | TP53,                                                                                                                              | NA    | 1   | [39]    |
| HLF     | Hepatocellular Carcinoma | NA            | TERT, TP53                                                                                                                         | NA    | 323 | [23,40] |
| Huh1    | Hepatocellular Carcinoma | NA            | AXIN1, TP53                                                                                                                        | NA    | 57  | [3,41]  |
| LX-2    | Normal                   | Stellate      | HSC/MFB, FN1,<br>collagen type IV,<br>collagen type I,<br>various TGF- $\beta$<br>receptors, vimentin,<br>desmin, $\alpha$ -smooth | 55-78 | 801 | [42,43] |

|           |        |            |                                |    |   |      |
|-----------|--------|------------|--------------------------------|----|---|------|
| LSEC line | Normal | Sinusoidal | muscle actin, CTGF,<br>and p21 | NA | 2 | [44] |
|-----------|--------|------------|--------------------------------|----|---|------|

1-information according to ATCC (<https://www.atcc.org/>) and Expasy Cellosaurus (<https://web.expasy.org/cellosaurus/>) ; 2 – information according to Expasy Cellosaurus (<https://web.expasy.org/cellosaurus/>), NA – no find data in ATCC (<https://www.atcc.org/>) and Expasy Cellosaurus (<https://web.expasy.org/cellosaurus/>), PubMed (<https://pubmed.ncbi.nlm.nih.gov/>) – accessed on 29 November 2021.

#### Reference:

1. Heffelfinger, S.C.; Hawkins, H.H.; Barrish, J.; Taylor, L.; Darlington, G.J. SK HEP-1: A Human Cell Line of Endothelial Origin. *In Vitro Cell Dev Biol* **1992**, *28A*, 136–142, doi:10.1007/BF02631017.
2. Davies, H.; Bignell, G.R.; Cox, C.; Stephens, P.; Edkins, S.; Clegg, S.; Teague, J.; Woffendin, H.; Garnett, M.J.; Bottomley, W.; et al. Mutations of the BRAF Gene in Human Cancer. *Nature* **2002**, *417*, 949–954, doi:10.1038/nature00766.
3. Yu, K.; Chen, B.; Aran, D.; Charalel, J.; Yau, C.; Wolf, D.M.; van 't Veer, L.J.; Butte, A.J.; Goldstein, T.; Sirota, M. Comprehensive Transcriptomic Analysis of Cell Lines as Models of Primary Tumors across 22 Tumor Types. *Nat Commun* **2019**, *10*, 3574, doi:10.1038/s41467-019-11415-2.
4. de La Coste, A.; Romagnolo, B.; Billuart, P.; Renard, C.A.; Buendia, M.A.; Soubrane, O.; Fabre, M.; Chelly, J.; Beldjord, C.; Kahn, A.; et al. Somatic Mutations of the Beta-Catenin Gene Are Frequent in Mouse and Human Hepatocellular Carcinomas. *Proc Natl Acad Sci U S A* **1998**, *95*, 8847–8851, doi:10.1073/pnas.95.15.8847.
5. Waldherr, M.; Mišić, M.; Ferk, F.; Tomc, J.; Žegura, B.; Filipič, M.; Mikulits, W.; Mai, S.; Haas, O.; Huber, W.W.; et al. Use of HuH6 and Other Human-Derived Hepatoma Lines for the Detection of Genotoxins: A New Hope for Laboratory Animals? *Arch Toxicol* **2018**, *92*, 921–934, doi:10.1007/s00204-017-2109-4.
6. Sagmeister, S.; Eisenbauer, M.; Pirker, C.; Mohr, T.; Holzmann, K.; Zwickl, H.; Bichler, C.; Kandioler, D.; Wrba, F.; Mikulits, W.; et al. New Cellular Tools Reveal Complex Epithelial–Mesenchymal Interactions in Hepatocarcinogenesis. *Br J Cancer* **2008**, *99*, 151–159, doi:10.1038/sj.bjc.6604440.
7. A Human Model of Epithelial to Mesenchymal Transition to Monitor Drug Efficacy in Hepatocellular Carcinoma Progression | Molecular Cancer Therapeutics Available online: <https://mct.aacrjournals.org/content/10/5/850.long> (accessed on 25 November 2021).
8. Yu, M.; Selvaraj, S.K.; Liang-Chu, M.M.Y.; Aghajani, S.; Busse, M.; Yuan, J.; Lee, G.; Peale, F.; Klijn, C.; Bourgon, R.; et al. A Resource for Cell Line Authentication, Annotation and Quality Control. *Nature* **2015**, *520*, 307–311, doi:10.1038/nature14397.
9. Qiu, Z.; Li, H.; Zhang, Z.; Zhu, Z.; He, S.; Wang, X.; Wang, P.; Qin, J.; Zhuang, L.; Wang, W.; et al. A Pharmacogenomic Landscape in Human Liver Cancers. *Cancer Cell* **2019**, *36*, 179-193.e11, doi:10.1016/j.ccell.2019.07.001.
10. Kasai, F.; Hirayama, N.; Ozawa, M.; Satoh, M.; Kohara, A. HuH-7 Reference Genome Profile: Complex Karyotype Composed of Massive Loss of Heterozygosity. *Hum Cell* **2018**, *31*, 261–267, doi:10.1007/s13577-018-0212-3.

11. Kawamoto, M.; Yamaji, T.; Saito, K.; Shirasago, Y.; Satomura, K.; Endo, T.; Fukasawa, M.; Hanada, K.; Osada, N. Identification of Characteristic Genomic Markers in Human Hepatoma HuH-7 and Huh7.5.1-8 Cell Lines. *Front Genet* **2020**, *11*, 546106, doi:10.3389/fgene.2020.546106.
12. Tian, J.; Tang, Z.Y.; Ye, S.L.; Liu, Y.K.; Lin, Z.Y.; Chen, J.; Xue, Q. New Human Hepatocellular Carcinoma (HCC) Cell Line with Highly Metastatic Potential (MHCC97) and Its Expressions of the Factors Associated with Metastasis. *Br J Cancer* **1999**, *81*, 814–821, doi:10.1038/sj.bjc.6690769.
13. Puisieux, A.; Galvin, K.; Troalen, F.; Bressac, B.; Marcais, C.; Galun, E.; Ponchel, F.; Yakicier, C.; Ji, J.; Ozturk, M. Retinoblastoma and P53 Tumor Suppressor Genes in Human Hepatoma Cell Lines. *FASEB J* **1993**, *7*, 1407–1413, doi:10.1096/fasebj.7.14.8224613.
14. Pinto, M.R.; Bey, E.; Bernstein, R. The PLC/PRF/5 Human Hepatoma Cell Line. I. Reevaluation of the Karyotype. *Cancer Genetics and Cytogenetics* **1985**, *18*, 11–18, doi:10.1016/0165-4608(85)90033-0.
15. Hwang, H.-J.; Kim, G.-J.; Lee, G.-B.; Oh, J.-T.; Chun, Y.-H.; Park, S.-H. A Comprehensive Karyotypic Analysis on Korean Hepatocellular Carcinoma Cell Lines by Cross-Species Color Banding and Comparative Genomic Hybridization. *Cancer Genetics and Cytogenetics* **2003**, *141*, 128–137, doi:10.1016/S0165-4608(02)00671-4.
16. Hussain, S.P.; Schwank, J.; Staib, F.; Wang, X.W.; Harris, C.C. TP53 Mutations and Hepatocellular Carcinoma: Insights into the Etiology and Pathogenesis of Liver Cancer. *Oncogene* **2007**, *26*, 2166–2176, doi:10.1038/sj.onc.1210279.
17. Park, J.G.; Lee, J.H.; Kang, M.S.; Park, K.J.; Jeon, Y.M.; Lee, H.J.; Kwon, H.S.; Park, H.S.; Yeo, K.S.; Lee, K.U. Characterization of Cell Lines Established from Human Hepatocellular Carcinoma. *Int J Cancer* **1995**, *62*, 276–282, doi:10.1002/ijc.2910620308.
18. Ku, J.-L.; Park, J.-G. Biology of SNU Cell Lines. *Cancer Res Treat* **2005**, *37*, 1–19, doi:10.4143/crt.2005.37.1.1.
19. Kang, M.S.; Lee, H.J.; Lee, J.H.; Ku, J.L.; Lee, K.P.; Kelley, M.J.; Won, Y.J.; Kim, S.T.; Park, J.G. Mutation of P53 Gene in Hepatocellular Carcinoma Cell Lines with HBX DNA. *Int J Cancer* **1996**, *67*, 898–902, doi:10.1002/(SICI)1097-0215(19960917)67:6<898::AID-IJC22>3.0.CO;2-X.
20. Ghandi, M.; Huang, F.W.; Jané-Valbuena, J.; Kryukov, G.V.; Lo, C.C.; McDonald, E.R.; Barretina, J.; Gelfand, E.T.; Bielski, C.M.; Li, H.; et al. Next-Generation Characterization of the Cancer Cell Line Encyclopedia. *Nature* **2019**, *569*, 503–508, doi:10.1038/s41586-019-1186-3.
21. SNU-387 | ATCC Available online: <https://www.atcc.org/products/crl-2237> (accessed on 28 November 2021).
22. SNU-423 | ATCC Available online: <https://www.atcc.org/products/crl-2238> (accessed on 28 November 2021).
23. Dor, I.; Namba, M.; Sato, J. Establishment and Some Biological Characteristics of Human Hepatoma Cell Lines. *Gan* **1975**, *66*, 385–392.
24. Pfeifer, A.M.; Cole, K.E.; Smoot, D.T.; Weston, A.; Groopman, J.D.; Shields, P.G.; Vignaud, J.M.; Juillerat, M.; Lipsky, M.M.; Trump, B.F. Simian Virus 40 Large Tumor Antigen-Immortalized Normal Human Liver Epithelial Cells Express Hepatocyte Characteristics and Metabolize Chemical Carcinogens. *Proc Natl Acad Sci U S A* **1993**, *90*, 5123–5127, doi:10.1073/pnas.90.11.5123.
25. Saravanakumar, A. An Omics Based Approach for the Identification of Biomarkers of Non-Alcoholic Fatty Liver Using in Vitro Models of Hepatic Steatosis. *Dissertations and Master's Theses (Campus Access)* **2019**, 1–184.
26. Buick, J.K.; Williams, A.; Meier, M.J.; Swartz, C.D.; Recio, L.; Gagné, R.; Ferguson, S.S.; Engelward, B.P.; Yauk, C.L. A Modern Genotoxicity Testing Paradigm: Integration of the High-Throughput CometChip® and the TGx-DDI Transcriptomic Biomarker in Human HepaRG™ Cell Cultures. *Frontiers in Public Health* **2021**, *9*, 1144, doi:10.3389/fpubh.2021.694834.
27. HepaRG™ Cells, Cryopreserved Available online: <https://www.thermofisher.com/order/catalog/product/HPRG10> (accessed on 28 November 2021).
28. Saijyo, S.; Kudo, T.; Suzuki, M.; Katayose, Y.; Shinoda, M.; Muto, T.; Fukuhara, K.; Suzuki, T.; Matsuno, S. Establishment of a New Extrahepatic Bile Duct Carcinoma Cell Line, TFK-1. *Tohoku J Exp Med* **1995**, *177*, 61–71, doi:10.1620/tjem.177.61.
29. SNU-449 | ATCC Available online: <https://www.atcc.org/products/crl-2234> (accessed on 28 November 2021).
30. Wiśniewski, J.R.; Vildhede, A.; Norén, A.; Artursson, P. In-Depth Quantitative Analysis and Comparison of the Human Hepatocyte and Hepatoma Cell Line HepG2 Proteomes. *J Proteomics* **2016**, *136*, 234–247, doi:10.1016/j.jprot.2016.01.016.
31. Haplotype-Resolved and Integrated Genome Analysis of the Cancer Cell Line HepG2 Available online: <https://www.ncbi.nlm.nih.gov/pmc/articles/PMC6486628/> (accessed on 28 November 2021).

32. JHH1 DepMap Cell Line Summary Available online: [https://depmap.org/portal/cell\\_line/ACH-000620?tab=mutation](https://depmap.org/portal/cell_line/ACH-000620?tab=mutation) (accessed on 28 November 2021).
33. Fujise, K.; Nagamori, S.; Hasumura, S.; Homma, S.; Sujino, H.; Matsuura, T.; Shimizu, K.; Niiya, M.; Kameda, H.; Fujita, K. Integration of Hepatitis B Virus DNA into Cells of Six Established Human Hepatocellular Carcinoma Cell Lines. *Hepatogastroenterology* **1990**, *37*, 457–460.
34. Nagamori, S.; Hasumura, S.; Kawada, M.; Matsuura, T.; Mizutani, S.; Yoshida, H. Human Hepatoma-Derived Cell Line FLC-4 and Method for Producing Useful Polymers by Culturing the Cell Line 1998.
35. CELL SEARCH SYSTEM -CELL BANK- (RIKEN BRC) [RCB1941 : Li-7] Available online: [https://cellbank.brc.riken.jp/cell\\_bank/CellInfo/?cellNo=RCB1941](https://cellbank.brc.riken.jp/cell_bank/CellInfo/?cellNo=RCB1941) (accessed on 28 November 2021).
36. Oefinger, P.E.; Bronson, D.L.; Dreesman, G.R. Induction of Hepatitis B Surface Antigen in Human Hepatoma-Derived Cell Lines. *J Gen Virol* **1981**, *53*, 105–113, doi:10.1099/0022-1317-53-1-105.
37. Image Classification of Human Carcinoma Cells Using Complex Wavelet-Based Covariance Descriptors Available online: <https://www.ncbi.nlm.nih.gov/pmc/articles/PMC3547046/#pone.0052807-Oefinger1> (accessed on 28 November 2021).
38. Hariparsad, N.; Carr, B.A.; Evers, R.; Chu, X. Comparison of Immortalized Fa2N-4 Cells and Human Hepatocytes as in Vitro Models for Cytochrome P450 Induction. *Drug Metab Dispos* **2008**, *36*, 1046–1055, doi:10.1124/dmd.108.020677.
39. Caruso, S.; Calatayud, A.-L.; Pilet, J.; La Bella, T.; Rekik, S.; Imbeaud, S.; Letouzé, E.; Meunier, L.; Bayard, Q.; Rohr-Udilova, N.; et al. Analysis of Liver Cancer Cell Lines Identifies Agents With Likely Efficacy Against Hepatocellular Carcinoma and Markers of Response. *Gastroenterology* **2019**, *157*, 760–776, doi:10.1053/j.gastro.2019.05.001.
40. Hsu, I.C.; Tokiwa, T.; Bennett, W.; Metcalf, R.A.; Welsh, J.A.; Sun, T.; Harris, C.C. P53 Gene Mutation and Integrated Hepatitis B Viral DNA Sequences in Human Liver Cancer Cell Lines. *Carcinogenesis* **1993**, *14*, 987–992, doi:10.1093/carcin/14.5.987.
41. Liver Cancer Cell Lines Database Available online: <https://lccl.zucmanlab.com/hcc/cellLines> (accessed on 25 November 2021).
42. Xu, L.; Hui, A.Y.; Albanis, E.; Arthur, M.J.; O'Byrne, S.M.; Blaner, W.S.; Mukherjee, P.; Friedman, S.L.; Eng, F.J. Human Hepatic Stellate Cell Lines, LX-1 and LX-2: New Tools for Analysis of Hepatic Fibrosis. *Gut* **2005**, *54*, 142–151, doi:10.1136/gut.2004.042127.
43. Weiskirchen, R.; Weimer, J.; Meurer, S.K.; Kron, A.; Seipel, B.; Vater, I.; Arnold, N.; Siebert, R.; Xu, L.; Friedman, S.L.; et al. Genetic Characteristics of the Human Hepatic Stellate Cell Line LX-2. *PLOS ONE* **2013**, *8*, e75692, doi:10.1371/journal.pone.0075692.
44. [Morphologic and Functional Characteristics of the Immortalized Human Liver Sinusoidal Endothelial Cell Line] - PubMed Available online: <https://pubmed.ncbi.nlm.nih.gov/20302755/> (accessed on 2 December 2021).
